# Supplementary material for: Blood cells and hematological parameters of Chiala Mountain Salamander, Batrachuperus karlschmidti (Urodela, Hynobiidae)
Source: PeerJ. 2023 May 19;11:e15446. doi: 10.7717/peerj.15446 (PMC10202104; doi:10.7717/peerj.15446)
Supplement: Supplemental Information 1 [file peerj-11-15446-s001.xls]

## Sheet: data
No	sex	age	snout-vent length	body mass	Hemoglobin(g/dl)	Erythrocyte count (104/mm3)	Leukocyte count (103/mm3)	Hct (%)	MCV (103/fl)	MCH (103/pg)	MCHC (%)	Neutrophils (%)	Monocytes (%)	Eosinophils (%)	Basophils (%)	Lymphocytes (%)	Erythrocyte length (EL,μm)	Erythrocyte width (EW, μm)	EL/EW	Erythrocyte area (EA, μm2)	Nucleus width (NW, μm)	Nucleus length (NL, μm)	NL/NW	Nucleus area (NA, μm2)
1	♀	10	79.63	14.73	2	3.5	1.182	23.15	6.61429	0.571429	8.63931	4	9	2	3	82	34.6578	19.4348	1.78329	528.75	10.4224	17.4772	1.67689	142.991
2	♀	11	70.36	14.86	1.5	3.5	0.749	29.6	8.45714	0.428571	5.06757	5	7	1	5	82	32.8496	22.2812	1.47432	574.564	9.91	14.9518	1.50876	116.315
3	♀	7	80.6	20.9	6.5	7.5	0.716	52.95	7.06	0.866667	12.2757	1	2	2	5	90	37.046	22.8078	1.62427	663.276	9.2378	14.0502	1.52095	101.887
4	♀	5	81.67	16.28	4	4.5	1.134	30.5	6.77778	0.888889	13.1148	6	14	2	8	70	37.6946	24.1456	1.56114	714.475	9.883	15.6328	1.58179	121.282
5	♀	8	81.07	28.16	7	6.5	1.009	44.95	6.91538	1.07692	15.5729	6	7	2	5	80	39.0658	22.022	1.77394	675.341	9.4086	15.163	1.61161	111.99
6	♀	13	82.25	12.1	2.5	6	1.085	27.05	4.50833	0.416667	9.24214	1	2	3	4	90	35.0798	21.9084	1.6012	603.306	8.6074	13.4442	1.56194	90.8399
7	♀	5	94.23	11.75	3.5	4	1.37	21.95	5.4875	0.875	15.9453	1	5	2	8	84	34.1456	21.4448	1.59226	574.813	10.364	15.8592	1.53022	129.026
8	♀	6	96.42	13.47	3.5	5.5	1.132	24.4	4.43636	0.636364	14.3443	3	6	2	1	88	35.622	21.4698	1.65917	600.366	9.1564	14.859	1.6228	106.803
9	♀	9	80.87	9.09	2.5	6.5	2.297	32.85	5.05385	0.384615	7.61035	3	11	3	2	81	38.7878	21.4686	1.80672	653.685	8.884	14.9436	1.68208	104.216
10	♀	9	92.9	8.26	3	4.5	1.891	20.55	4.56667	0.666667	14.5985	3	7	3	9	78	35.2444	22.757	1.54873	629.615	8.9688	13.9566	1.55613	98.2616
11	♀	10	85.46	11.51	3.5	10	2.404	22.7	2.27	0.35	15.4185	7	4	4	2	83	34.47	20.9474	1.64555	566.815	10.0732	16.188	1.60704	128.006
12	♀	9	82.17	8.74	1.5	4	1.286	27.9	6.975	0.375	5.37634	5	6	3	8	78	33.2098	20.7622	1.59953	541.264	10.0784	16.2108	1.60847	128.252
13	♂	9	81.84	16.15	8	10.5	2.108	46.05	4.38571	0.761905	17.3724	4	5	1	2	88	34.8424	21.9826	1.585	601.252	9.394	14.3864	1.53145	106.089
14	♂	13	77.15	16.82	2	2.5	1.785	20	8	0.8	10	2	4	2	5	87	34.8128	20.1534	1.72739	550.753	8.234	14.1594	1.71963	91.522
15	♂	11	65.97	19.53	5	12.5	4.401	37.4	2.992	0.4	13.369	2	13	1	5	79	33.7736	22.444	1.50479	595.042	9.5502	15.0866	1.57972	113.103
16	♂	4	81.73	12.51	2.5	11.5	2.812	30.325	2.63696	0.217391	8.24402	4	5	1	6	84	35.9906	20.1176	1.78901	568.375	9.4122	15.9338	1.69289	117.728
17	♂	6	79.87	11.63	8.5	14.5	2.996	42.05	2.9	0.586207	20.214	5	6	2	3	84	33.2206	19.5958	1.69529	511.023	8.8952	14.8782	1.67261	103.89
18	♂	9	83.53	11.91	4.5	11.5	2.154	25.75	2.23913	0.391304	17.4757	3	4	1	6	86	35.4356	21.8184	1.62412	606.921	9.573	15.4198	1.61076	115.877
19	♂	9	83.22	11.16	3	8.5	4.404	17.95	2.11176	0.352941	16.7131	6	7	3	7	77	38.5122	21.0326	1.83107	635.859	9.238	15.4474	1.67216	112.022
20	♂	6	83.26	9.15	5	12	3.797	43.1	3.59167	0.416667	11.6009	5	8	4	6	77	37.4516	22.611	1.65634	664.752	9.2382	15.2878	1.65485	110.867
